# Supplementary material for: A chitosan-Au-hyperbranched polyester nanoparticles-based antifouling immunosensor for sensitive detection of carcinoembryonic antigen
Source: Royal Society of Chemistry journal article supplement (doi:10.1039/c4an00479e), 2014-01-01
Supplement: c4an00479e1.pdf [file c4an00479e1.pdf]

## Supporting Information

### A chitosan-Au-hyperbranched polyester nanoparticles-based antifouling immunosensor for sensitive detection of carcinoembryonic antigen

Chong Sun<sup>a,b</sup>, Lie Ma<sup>a</sup>, Qiuhui Qian<sup>a</sup>, Soniya Parmar<sup>c</sup>,  
Wenbo Zhao<sup>\*,a</sup>, Bo Zhao<sup>a</sup>, Jian Shen<sup>\*,a</sup>

<sup>a</sup>*Jiangsu Collaborative Innovation Center of Biomedical Functional Materials,  
Jiangsu Key Laboratory of Biofunctional Materials, College of Chemistry and  
Materials Science, Nanjing Normal University, Nanjing 210023, PR China*

<sup>b</sup>*Key Laboratory for Soft Chemistry and Functional Materials of Ministry of  
Education, School of Chemical Engineering, Nanjing University of Science and  
Technology, Nanjing 210094, PR China*

<sup>c</sup>*Department of Biological Sciences and Bioengineering, Indian Institute of  
Technology, Kanpur 208016, India*

\*Corresponding authors.

E-mail address: zhaowenbo@njnu.edu.cn, jshen@njnu.edu.cn.

Tel/Fax: +862583598280.

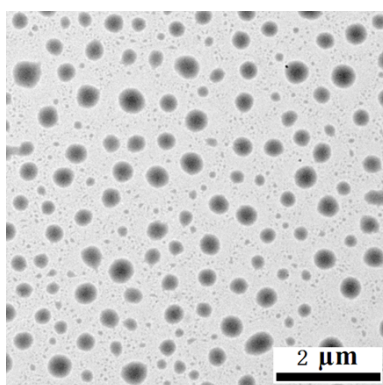

**Fig. S1.** Representative TEM for HBPE-CA NPs.

Clinically, activated partial thromboplastin time (APTT), prothrombin time (PT) and thrombin time (TT) are used to evaluate *in vitro* the antithrombogenicity of a given biomaterial.<sup>1,2</sup> The results were given in Fig. S2. There was no significant difference of TT values between the control sample (12.3 s) and HBPE-CA NPs (12.2 s). But the APTT/PT were statistically longer in test (25.1 s/13.9 s) after the injection of HBPE-CA NPs than in controls (22.0 s/9.8 s), respectively. Thus, it is considered that the good antithrombogenicity of HBPE-CA NPs can be attribute to the surface modification of HBPE with carboxylic acid functional groups that produce electrostatic repulsion between the material surface and blood components.<sup>3</sup>

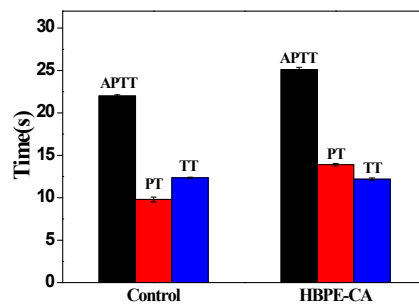

**Fig. S2.** Coagulation assays of HBPE-CA NPs.

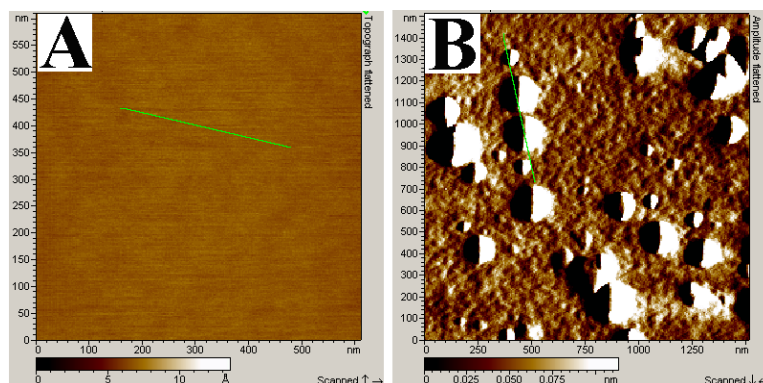

**Fig. S3.** The AFM images of (A) blank GCE, and (B) GCE electro-deposited with CS-Au NPs.

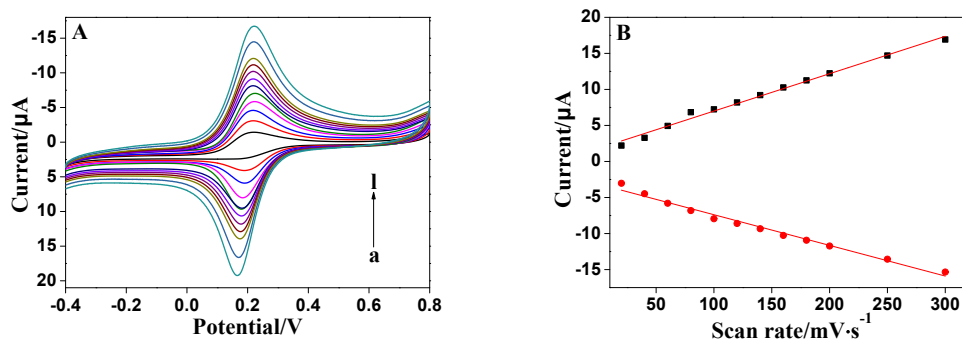

**Fig. S4.** (A) CVs of (HBPE-CA)/CS-Au modified GCE in 0.1 M PBS (pH=7.4) at different scan rates. Scan rate (from a to l): 20, 40, 60, 80, 100, 120, 140, 160, 180, 200, 250, 300  $\text{mV}\cdot\text{s}^{-1}$ . (B) Plots of anodic and cathodic peak current vs. scan rate.

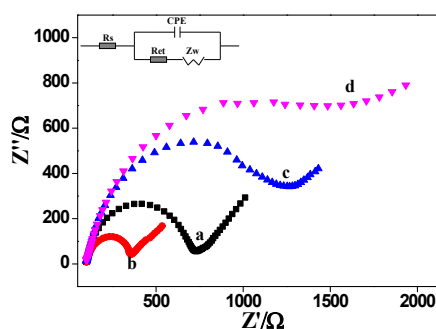

**Fig. S5.** Electrochemical impedance spectra of (a) bare GCE, (b) CS-Au/GCE, (c) (HBPE-CA)/CS-Au/GCE and (d) anti-CEA/(HBPE-CA)/CS-Au/GCE recorded at the open circuit potential in 10 mM  $[\text{Fe}(\text{CN})_6]^{3-/4-}$  (1:1) solution containing 0.1 M KCl. Inset is a schematic of the equivalent circuit.

**Table S1.** Comparison of analytical properties of some electrochemical immunosensors towards CEA.

|                               | Detection limit                  | Linear range                     | Ref. |
|-------------------------------|----------------------------------|----------------------------------|------|
| Electrochemical immunosensors | $(\text{fg}\cdot\text{mL}^{-1})$ | $(\text{fg}\cdot\text{mL}^{-1})$ |      |

|                                               |                   |                                     |                    |
|-----------------------------------------------|-------------------|-------------------------------------|--------------------|
| Anti-CEA/HRP/magnetic gold                    | $1 \times 10^4$   | $1 \times 10^4$ - $1.6 \times 10^8$ | Tang et al., 2008  |
| Anti-CEA/AuNPs/PB                             | $1.4 \times 10^3$ | $2.5 \times 10^2$ - $2 \times 10^6$ | Lai et al., 2009   |
| Anti-CEA/AuNP/TH/NF                           | $5 \times 10^3$   | $1 \times 10^4$ - $1.2 \times 10^7$ | Lia et al., 2011   |
| BSA/anti-CEA/nano-Au/PDDA                     | $1.6 \times 10^4$ | $5 \times 10^4$ - $4.5 \times 10^7$ | Liang et al., 2011 |
| Anti-CEA/Au-Gra/CS-Fc+TiO <sub>2</sub>        | $3.4 \times 10^3$ | $1 \times 10^4$ - $8 \times 10^7$   | Han et al., 2011   |
| Anti-CEA/AuNPs@nafion/Fc@CHIT                 | $3 \times 10^3$   | $1 \times 10^4$ - $1.5 \times 10^8$ | Shi and Ma, 2011   |
| Anti-CEA/Ag-SiO <sub>2</sub> @nafion/Thi@CHIT | 1                 | $1$ - $1 \times 10^5$               | Wang et al., 2013  |
| Anti-CEA/(HBPE-CA)/CS-Au/GCE                  | 0.251             | $1$ - $1 \times 10^7$               | This work          |

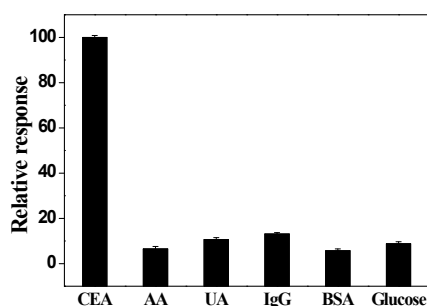

**Fig. S6.** The selectivity of the developed immunosensor for CEA.

#### References:

- 1 F.Y. Du, H. Wang, W. Zhao, D. Li, D.L. Kong, J. Yang and Y.Y. Zhang, *Biomaterials*, 2012, **33**, 762-770.
- 2 S.E. Skrabalak, J. Chen, L. Au, X. Lu, X. Li and Y.N. Xia, *Adv. Mater.*, 2007, **19**, 3177-3184.
- 3 K. Yu and J.N. Kizhakkedathu, *ACS Symp. Ser.*, 2012, **1120**, 577-603.
